# Supplementary figures and images for: Reproductive Health Experiences of Females Diagnosed with Young-Onset Colorectal Cancer: A Multi-Method Cross-Sectional Survey
Source: MDPI journal article supplement (doi:10.3390/curroncol29020042), 2022-01-21

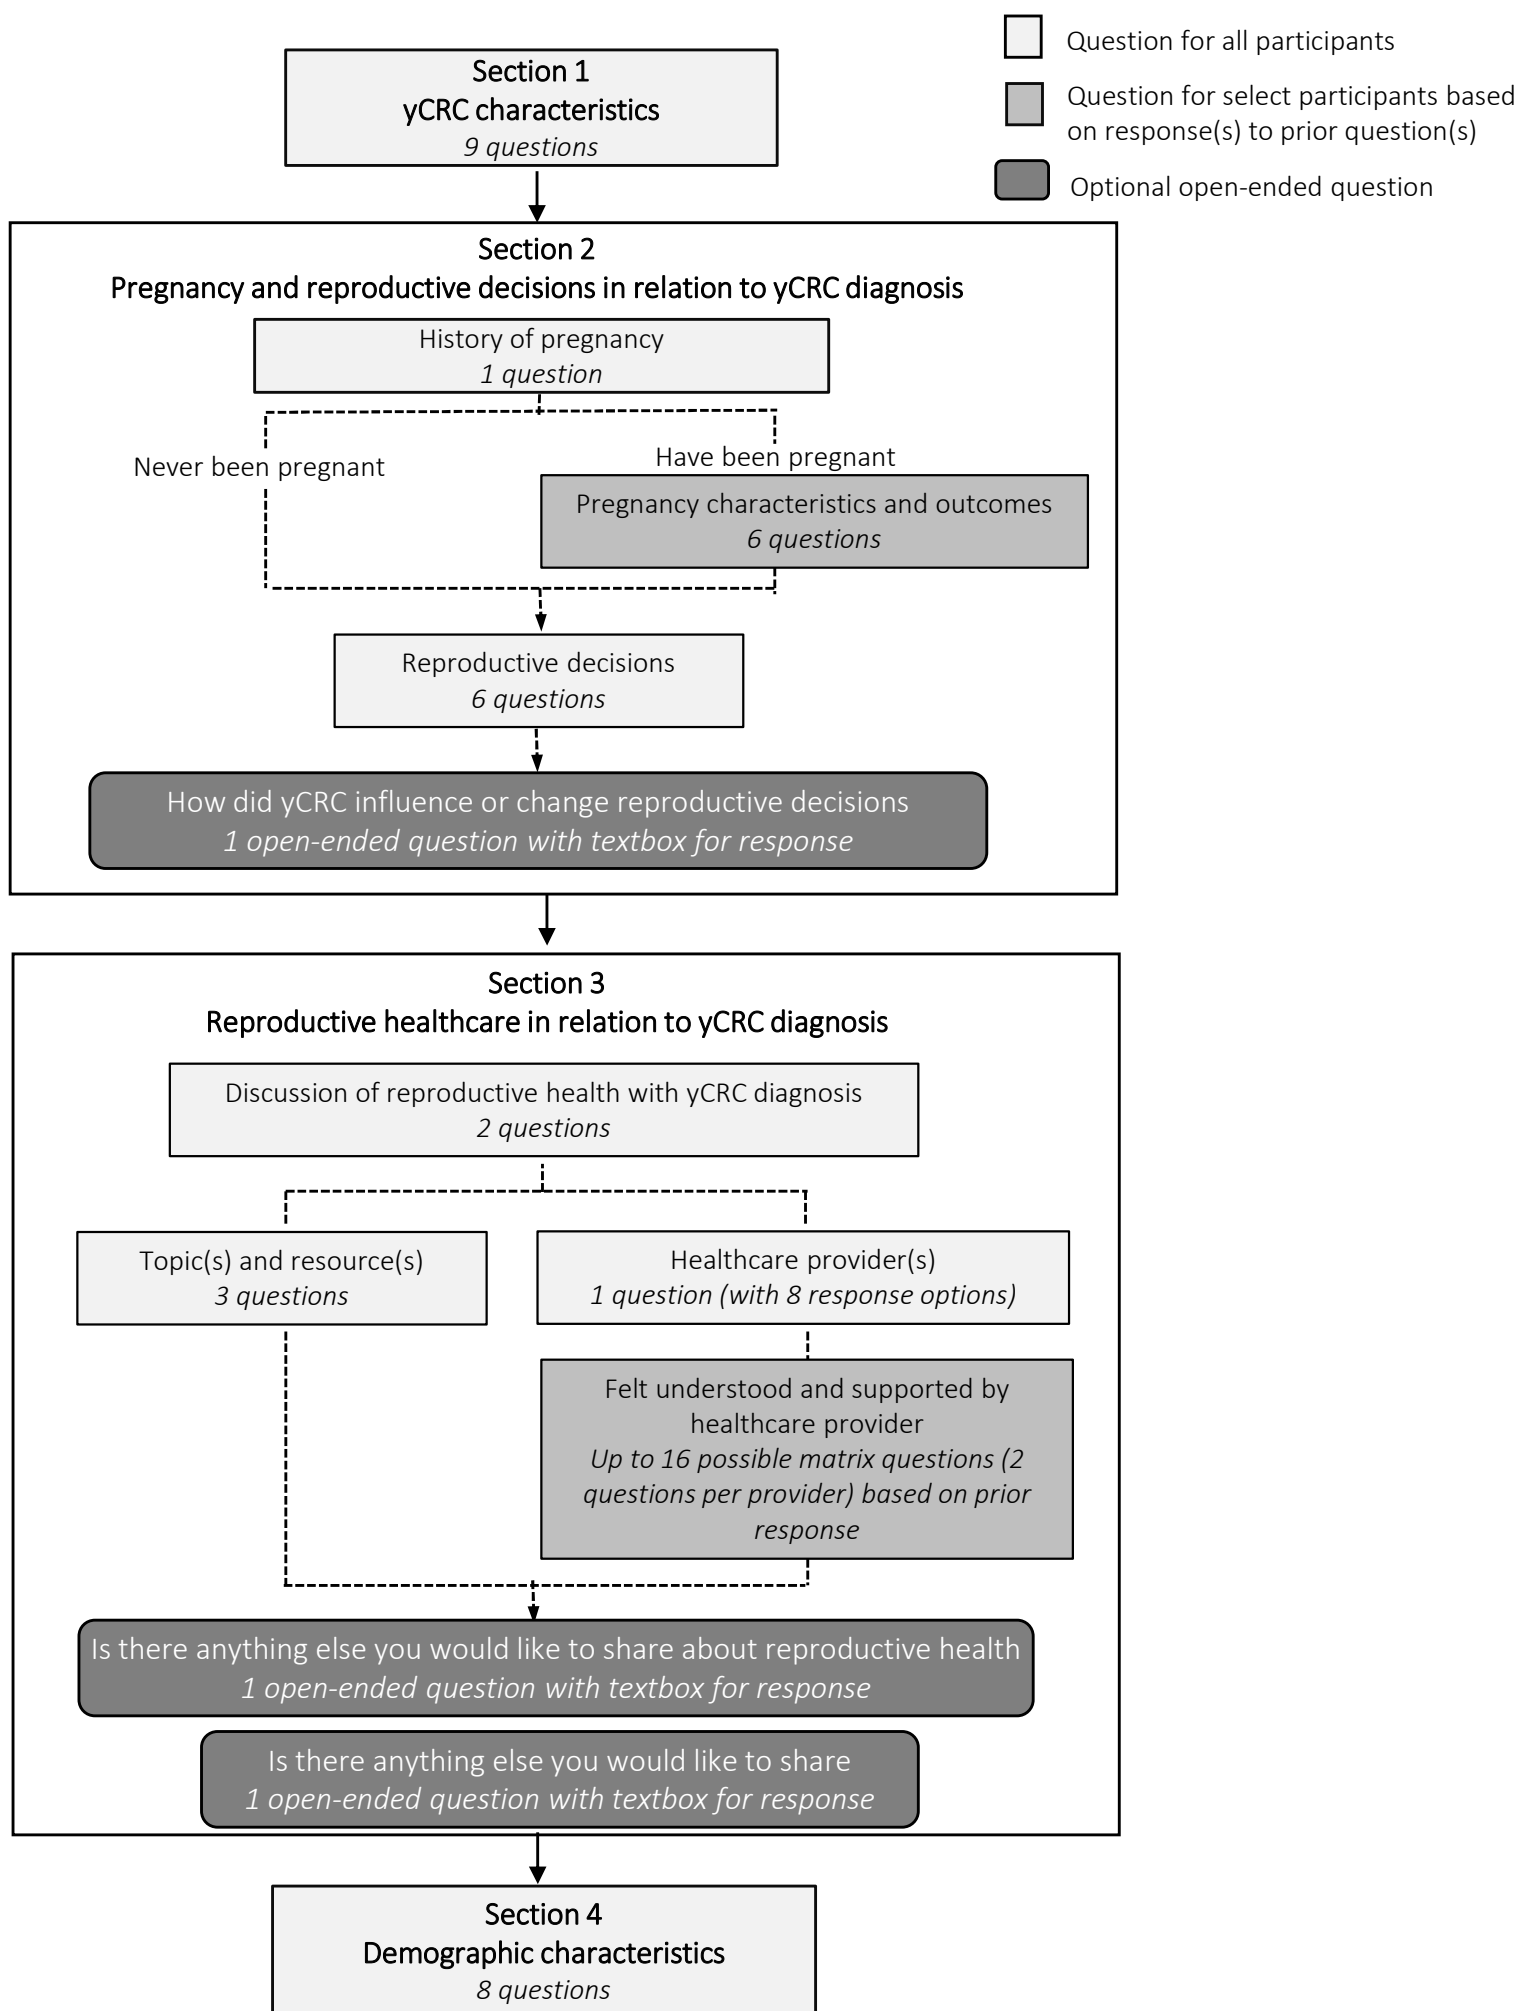

**Supplementary Figure S1.** Overview of survey design

Supplement: s1 [file s1]
